# Supplementary material for: Boosting the electrochemistry of Li2O2 in lithium–oxygen batteries by plasmon-induced hot-electron injection
Source: Royal Society of Chemistry journal article supplement (doi:10.1039/d1nj04097a), 2021-01-01
Supplement: d1nj04097a1.pdf [file d1nj04097a1.pdf]

## **Electronic Supporting Information**

### **Boosting the Electrochemistry of $\text{Li}_2\text{O}_2$ in Lithium–Oxygen**

### **Batteries by Plasmon-induced Hot-Electron Injection**

Weixue Yang,<sup>†</sup> Fei Li,<sup>†</sup> Huali Liu, Zhen Li, Jiaqi Zhao, and Yu Wang<sup>\*</sup>

## Table of Contents

|                                                                                                                                                                                                                 |    |
|-----------------------------------------------------------------------------------------------------------------------------------------------------------------------------------------------------------------|----|
| <b>Figure S1</b> Nitrogen adsorption-desorption isotherms of SO .....                                                                                                                                           | 4  |
| <b>Figure S2</b> Photo response of the discharge voltage in a photo-assisted Li–O <sub>2</sub> battery with a current density of 100 mA g <sup>-1</sup> when illumination is switched from "on" to "off". ..... | 5  |
| <b>Figure S3</b> Schematic configuration diagram of light-assisted Li–O <sub>2</sub> battery .....                                                                                                              | 6  |
| <b>Figure S4</b> CV curves of Li–O <sub>2</sub> batteries with ASO-L and SO-L cathodes in O <sub>2</sub> at 0.1 mV s <sup>-1</sup> .....                                                                        | 7  |
| <b>Figure S5.</b> CV curves of Li–O <sub>2</sub> batteries with and without illumination for SP cathodes (SP-L and SP) in O <sub>2</sub> at 0.1 mV S <sup>-1</sup> .....                                        | 8  |
| <b>Figure S6.</b> LSV curves of ORR employing SP with and without illumination at 50 mV s <sup>-1</sup> in Li–O <sub>2</sub> batteries.....                                                                     | 9  |
| <b>Figure S7.</b> LSV curves of OER employing SP with and without illumination at 50 mV s <sup>-1</sup> in Li–O <sub>2</sub> batteries.....                                                                     | 10 |
| <b>Figure S8</b> The discharge and charge profiles of the Li–O <sub>2</sub> batteries at 100 mA g <sup>-1</sup> with and without illumination.....                                                              | 11 |
| <b>Figure S9</b> Voltage profiles of typical Li–O <sub>2</sub> batteries cycled with the                                                                                                                        |    |

current density of  $200 \text{ mA g}^{-1}$  with and without illumination.....12

**Figure S10** Galvanostatic charge–discharge profiles of the  $\text{Li-O}_2$  batteries at different current densities with illumination.....13

**Figure S11** Galvanostatic charge–discharge profiles of the  $\text{Li-O}_2$  batteries at different current densities without illumination .....14

**Figure S12.** The XRD pattern of ASO after 40 cycles.....15

**Figure S13.** The charge–discharge profiles of SP at  $100 \text{ mA g}^{-1}$  with and without illumination in  $\text{Li-O}_2$  batteries.....16

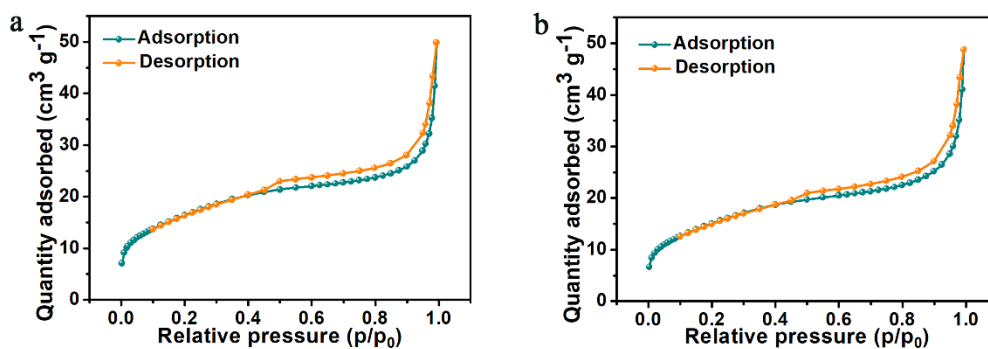

**Figure S1.** Nitrogen adsorption-desorption isotherms of a) ASO and b) SO.

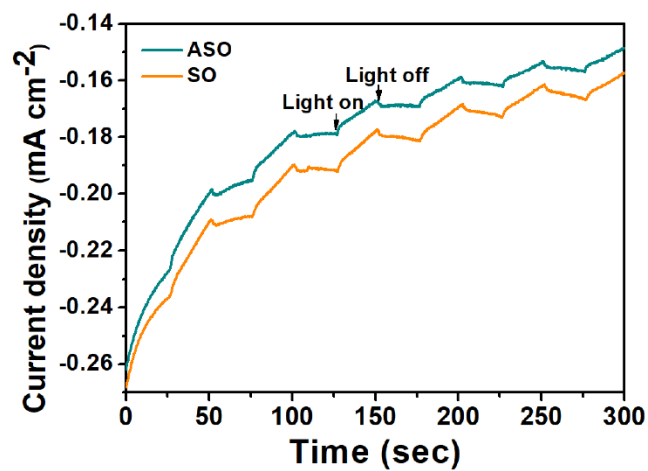

**Figure S2.** Photo response of the discharge voltage in a photo-assisted Li–O<sub>2</sub> battery with a current density of 100 mA g<sup>-1</sup> when illumination is switched from "on" to "off".

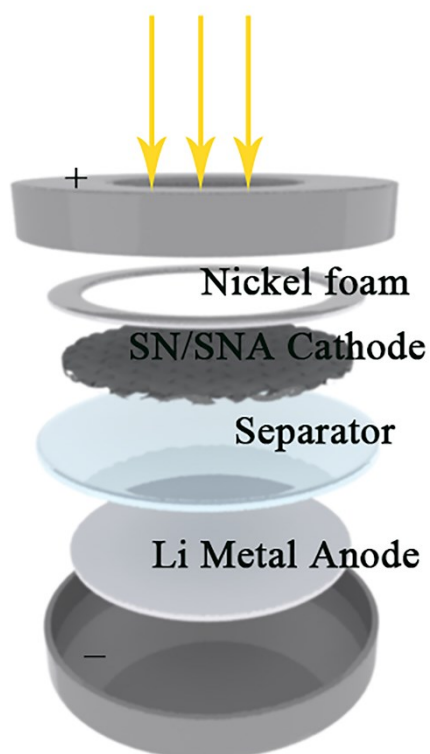

**Figure S3.** Schematic configuration diagram of light-assisted Li–O<sub>2</sub> battery.

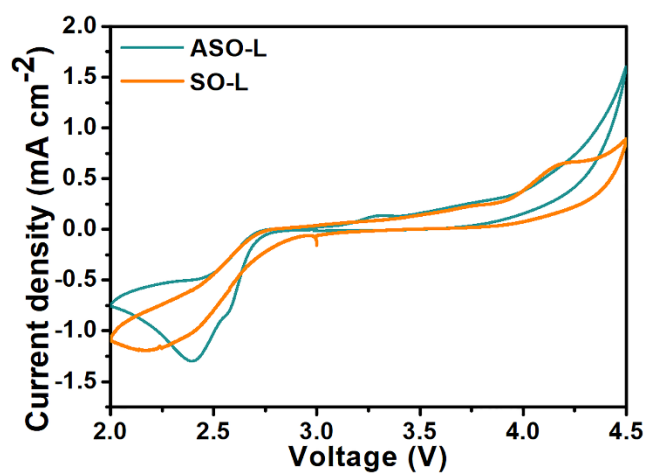

**Figure S4.** CV curves of Li–O<sub>2</sub> batteries with ASO-L and SO-L cathodes in O<sub>2</sub> at 0.1 mV s<sup>-1</sup>.

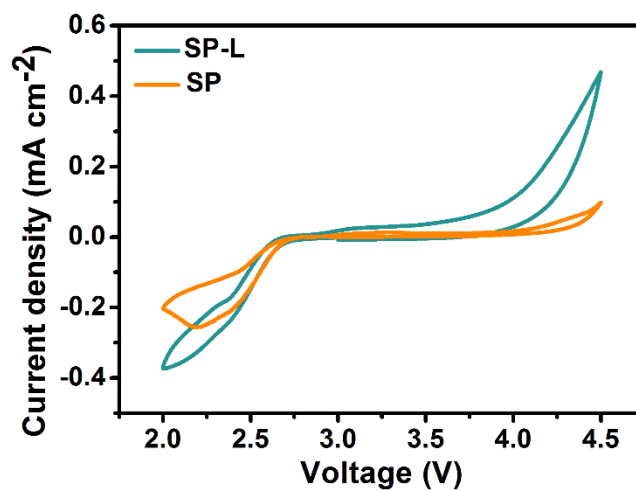

**Figure S5.** CV curves of Li–O<sub>2</sub> batteries with and without illumination for SP cathodes (SP-L and SP) in O<sub>2</sub> at 0.1 mV S<sup>-1</sup>.

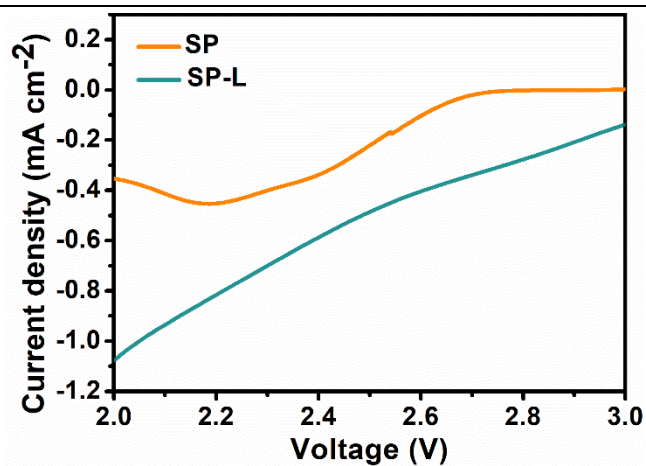

**Figure S6.** LSV curves of ORR employing SP with and without illumination at 50 mV s<sup>-1</sup> in Li–O<sub>2</sub> batteries.

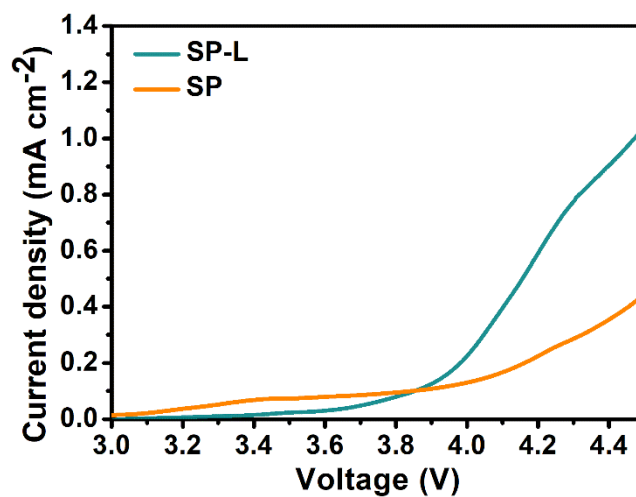

**Figure S7.** LSV curves of OER employing SP with and without illumination at 50 mV s<sup>-1</sup> in Li-O<sub>2</sub> batteries.

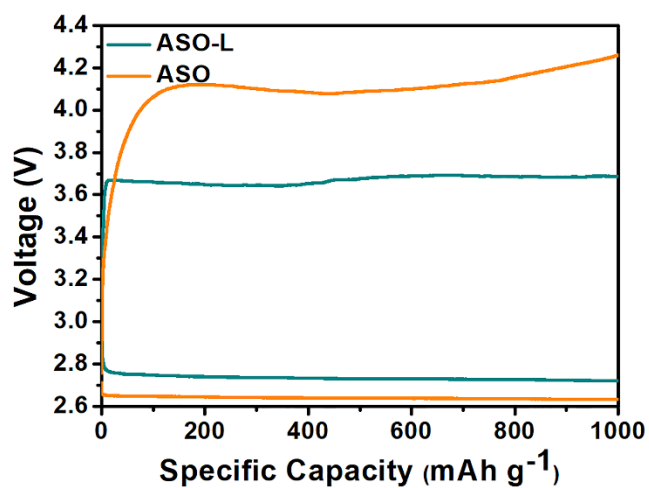

**Figure S8.** The discharge and charge profiles of the Li–O<sub>2</sub> batteries at 100 mA g<sup>-1</sup> with and without illumination.

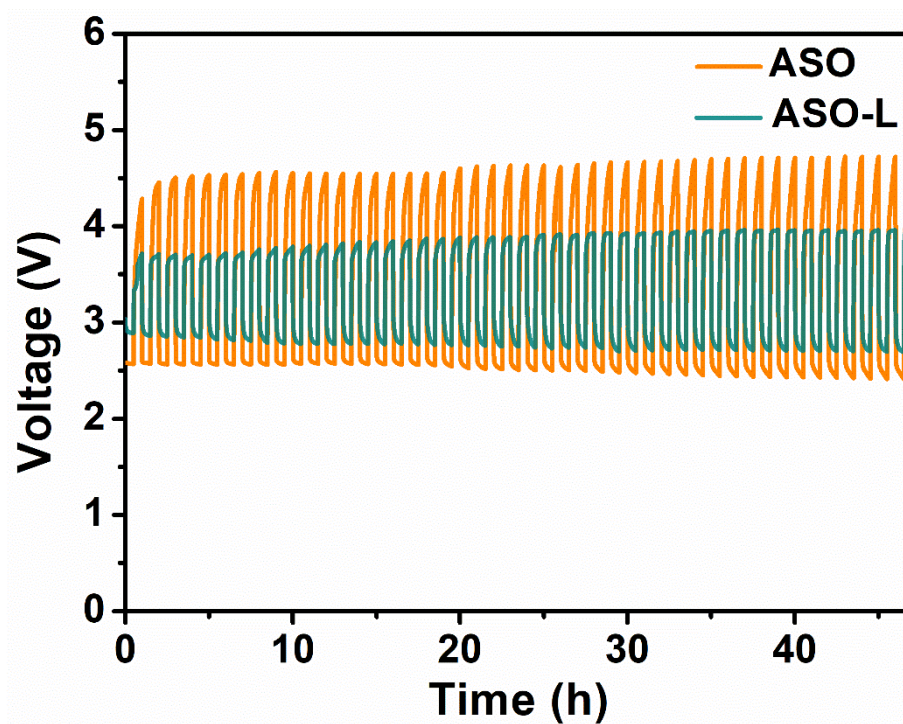

**Figure S9.** Voltage profiles of typical Li–O<sub>2</sub> batteries cycled with the current density of 200 mA g<sup>−1</sup> with and without illumination.

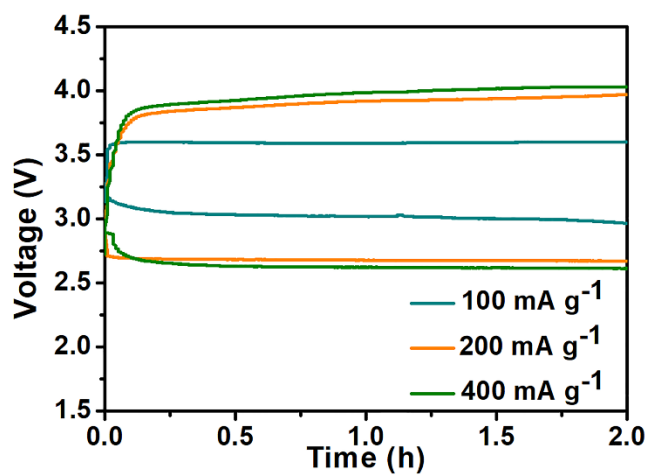

**Figure S10.** Galvanostatic charge–discharge profiles of the Li–O<sub>2</sub> batteries at different current densities with illumination.

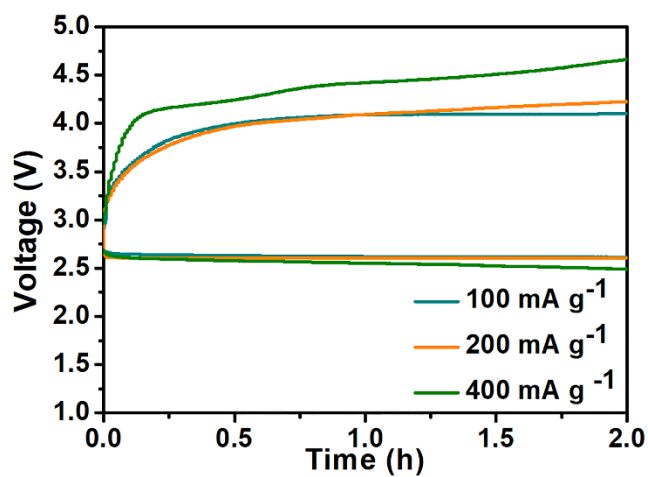

**Figure S11.** Galvanostatic charge–discharge profiles of the Li–O<sub>2</sub> batteries at different current densities without illumination.

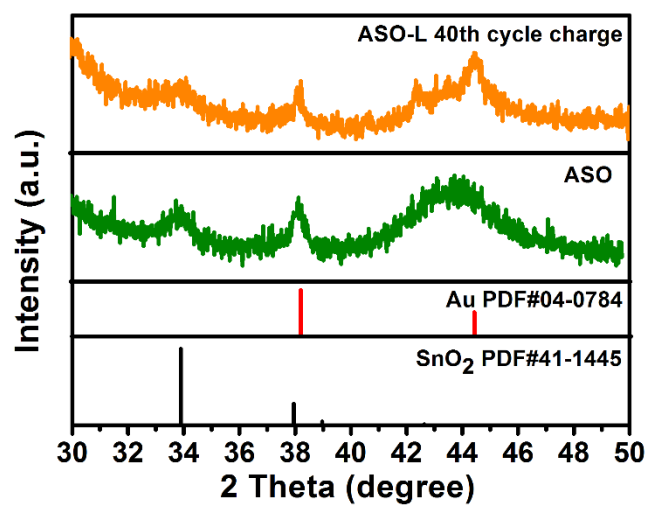

**Figure S12.** The XRD pattern of ASO after 40 cycles.

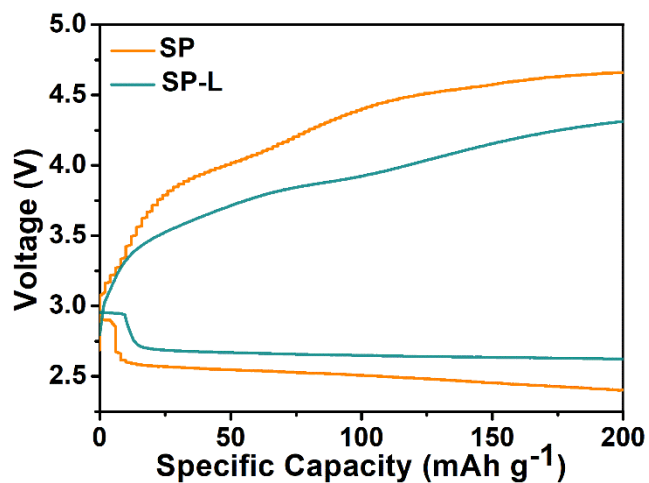

**Figure S13.** The charge–discharge profiles of SP at 100 mA g<sup>-1</sup> with and without illumination in Li–O<sub>2</sub> batteries.
